# Supplementary material for: Enhanced reduction of polymerization-induced shrinkage stress via combination of radical ring opening and addition fragmentation chain transfer
Source: Royal Society of Chemistry journal article supplement (doi:10.1039/c8py01540f), 2019-01-01
Supplement: c8py01540f1.pdf [file c8py01540f1.pdf]

Supporting Information for:

Enhanced reduction of polymerization-induced  
shrinkage stress via combination of radical ring  
opening and addition fragmentation chain transfer

*Sebastian Schoerpf,<sup>†,‡</sup> Yohann Catel,<sup>‡,||</sup> Norbert Moszner,<sup>‡,||</sup> Christian Gorsche<sup>†,‡,\*</sup> and Robert  
Liska<sup>†,‡</sup>*

<sup>†</sup>Institute of Applied Synthetic Chemistry, Technische Universität Wien, Getreidemarkt 9/163  
MC, A-1060 Vienna, Austria

<sup>‡</sup>Christian Doppler Laboratory for Photopolymers in Digital and Restorative Dentistry,  
Technische Universität Wien, Getreidemarkt 9/163 MC, A-1060 Vienna, Austria

<sup>||</sup>Ivoclar Vivadent AG, Bendererstrasse 2, FL-9494 Schaan, Liechtenstein

\*corresponding author: christian.gorsche@tuwien.ac.at

## 1. Experimental procedures

### Syntheses of 1-(ethoxycarbonyl)-2-vinylcyclopropane-1-carboxylic acid **2**

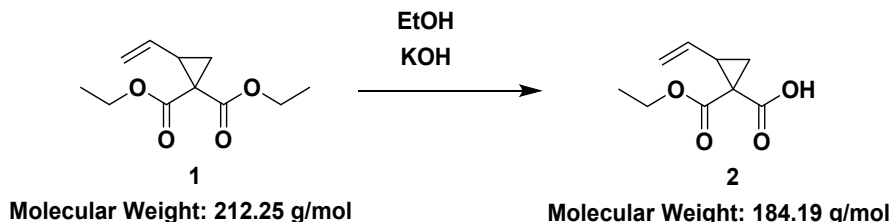

1,1-Diethoxycarbonyl-2-vinylcyclopropane **1** (157.4 g, 714.6 mmol) was dissolved in ethanol (325 mL). The mixture was cooled down to 0 °C, KOH (46.1 g, 821.6 mmol) was added in small portions and the resulting solution was stirred for 2 h at RT. Then, the solution was filtered and concentrated under reduced pressure. Distilled water (150 mL) was added to the solution and the aqueous layer was extracted with Et<sub>2</sub>O (diethyl ether) (2x60 mL). The organic phase was discarded. HCl (120 mL, 1N) was added to the aqueous solution, which was subsequently extracted with Et<sub>2</sub>O (3x90 mL). The organic layers were combined, dried over Na<sub>2</sub>SO<sub>4</sub> and filtered. After concentration under reduced pressure, 96.25 g (522.56 mmol) of the desired product **2** were isolated.

Yield: 71%. Aspect: slightly yellow oil. <sup>1</sup>H NMR (400 MHz, CDCl<sub>3</sub>): δ = 1.32 (t, <sup>3</sup>J<sub>HH</sub> = 7.1 Hz, 3H, CH<sub>3</sub>CH<sub>2</sub>O); 2.01 (dd, <sup>2</sup>J<sub>HH</sub> = 4.6 Hz, <sup>3</sup>J<sub>HH</sub> = 8.4 Hz, 1H, CH<sub>2</sub>CHCH=CH<sub>2</sub>); 2.17 (dd, <sup>2</sup>J<sub>HH</sub> = 4.6 Hz, <sup>3</sup>J<sub>HH</sub> = 9.3 Hz, 1H, CH<sub>2</sub>CHCH=CH<sub>2</sub>); 2.76 (q, <sup>3</sup>J<sub>HH</sub> = 8.8 Hz, 1H, CH<sub>2</sub>CHCH=CH<sub>2</sub>); 4.22-4.37 (m, 2H, CH<sub>3</sub>CH<sub>2</sub>O); 5.26 (dd, <sup>2</sup>J<sub>HH</sub> = 1.2 Hz, <sup>3</sup>J<sub>HH</sub> = 9.8 Hz, 1H, CH=CH<sub>2</sub>); 5.41 (dd, <sup>2</sup>J<sub>HH</sub> = 1.0 Hz, <sup>3</sup>J<sub>HH</sub> = 15.7 Hz, 1H, CH=CH<sub>2</sub>); 5.64-5.76 (m, 1H, CH<sub>2</sub>=CH). <sup>13</sup>C NMR (100 MHz, CDCl<sub>3</sub>): δ = 14.2 (OCH<sub>2</sub>CH<sub>3</sub>); 23.5 (CH<sub>2</sub>=CHCHCH<sub>2</sub>); 33.2 (COCCO); 39.1 (CCHCH); 62.9 (CH<sub>2</sub>OCO); 120.9 (CH=CH<sub>2</sub>); 132.2 (CH=CH<sub>2</sub>); 171.2 (C=O); 172.9 (C=O).

### Synthesis of ADVCP

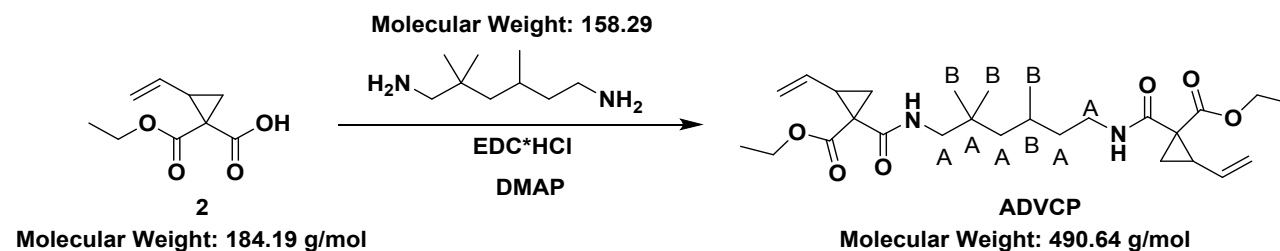

Under argon atmosphere, 4-dimethylaminopyridine (DMAP, 0.2 g, 1.6 mmol) was added to a solution of 1-ethoxycarbonyl-2-vinylcyclopropanecarboxylic acid **2** (30.00 g, 162.88 mmol) and dry DCM (100 mL). The solution was cooled to 0 °C. 1-Ethyl-3-(3-dimethylaminopropyl)carbodiimide (EDC·HCl, 36.97 g, 179.16 mmol) was dissolved in dry DCM and added over a dropping funnel to the reaction mixture. The solution was stirred for 15 min and then 2,2,4,4-trimethyl-1,6-hexandiamine (11.64 g, 81.44 mmol) was added dropwise. The solution temperature did not raise over 0 °C and it was stirred for 3 h at 0 °C and then overnight at RT. The reaction mixture was filtered and washed with distilled water (2 × 200 mL). The organic layer was dried over Na<sub>2</sub>SO<sub>4</sub> and concentrated under reduced pressure. The

crude product was purified by flash column chromatography (eluent = ethyl acetate (EA)/ petrol ether (PE): 2/8). 32.36 g (65.95 mmol) of the desired compound **ADVCP** were isolated.

Yield: 81%. Aspect: colorless viscous oil, mixture of isomers.  $^1\text{H NMR}$  (400 MHz;  $\text{CDCl}_3$ ):  $\delta$  = 0.68- 0.99 (m, 9H,  $\text{CH}_3$ ); 1.17-1.31 (m, 8H,  $\text{OCH}_2\text{CH}_3$  and  $\text{CH}_2$ ); 1.33-1.62 (m, 2H,  $\text{NHCH}_2$ ); 1.64-2.09 (m, 5H,  $\text{CH}_2\text{CHCH}=\text{CH}_2$  and  $\text{CH}_2$ ); 2.28-3.41 (m, 4H,  $\text{CH}_2\text{CH}$  and  $\text{NHCH}_2$ ); 4.02-4.78 (m, 4H,  $\text{OCH}_2\text{CH}_3$ ); 4.97-5.20 (m, 2H,  $\text{CH}_2=\text{CH}$ ); 5.20-5.36 (m, 2H,  $\text{CH}_2=\text{CH}$ ); 5.49-5.79 (m, 2H,  $\text{CH}_2=\text{CH}$ ); 8.30 (s, 1H, NH); 8.48 (s, 1H, NH). ( $\text{CDCl}_3$ , 100 MHz,  $\delta$ ): 14.3 ( $\text{OCH}_2\text{CH}_3$ ); 21.9 ( $\text{CH}_2\text{CHCH}=\text{CH}_2$ ); 22.4 ( $\text{C}_\text{B}$ ); 25.4 ( $\text{CH}_2\text{CHCH}=\text{CH}_2$ ); 25.7 ( $\text{C}_\text{B}$ ); 26.6 ( $\text{C}_\text{B}$ ); 27.2 ( $\text{C}_\text{B}$ ); 29.1 ( $\text{C}_\text{B}$ ); 33.1 ( $\text{C}_\text{A}$ ); 34.3 ( $\text{COCCO}$ ); 36.7 ( $\text{C}_\text{A}$ ); 38.8 ( $\text{C}_\text{A}$ ); 41.9 ( $\text{C}_\text{A}$ ); 46.8 ( $\text{C}_\text{A}$ ); 47.6 ( $\text{C}_\text{A}$ ); 50.1 ( $\text{C}_\text{A}$ ); 61.4 ( $\text{CH}_2\text{OCO}$ ); 119.5 ( $\text{CH}_2=\text{CH}$ ); 133.5 ( $\text{CH}_2=\text{CH}$ ); 168.0 ( $\text{C}=\text{O}$ ); 171.4 ( $\text{C}=\text{O}$ ).

### Synthesis of **TEGDVCP**

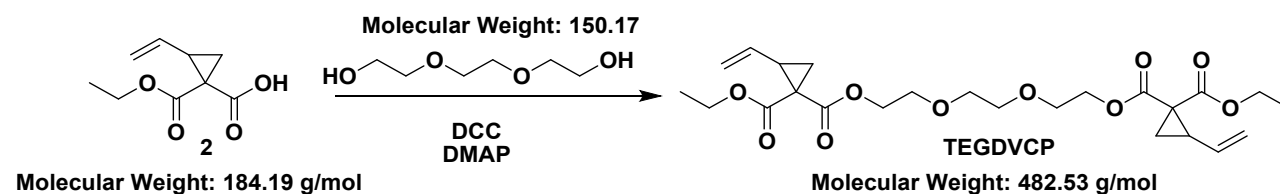

4-Dimethylaminopyridine (DMAP, 0.2 g, 1.6 mmol) was added to a solution of 1-ethoxycarbonyl-2-vinylcyclopropanecarboxylic acid **2** (30.00 g, 162.88 mmol) and triethylene glycol (11.64 g, 81.44 mmol) in dry DCM (180 mL) under argon atmosphere. The solution was cooled down to 0 °C. *N,N'*-Dicyclohexylcarbodiimide (DCC, 36.97 g, 179.16 mmol) was added in small portions to the reaction mixture. The solution was stirred for 3 h at 0 °C. Then, the reaction mixture was filtered and washed with distilled water (2 × 60 mL). The organic layer was dried over  $\text{Na}_2\text{SO}_4$  and concentrated under reduced pressure. The crude product was purified by flash column chromatography (eluent = EA/PE : 2/3). 31.89 g (66.09 mmol) of the desired compound **TEGDVCP** were isolated.

Yield: 81%. Aspect: colorless, viscous oil.  $^1\text{H NMR}$  (400 MHz,  $\text{CDCl}_3$ ):  $\delta$  = 1.26 (t,  $^3\text{J}_{\text{HH}} = 7.1$  Hz, 6H,  $\text{OCH}_2\text{CH}_3$ ); 1.57 (dd,  $^2\text{J}_{\text{HH}} = 4.9$  Hz,  $^3\text{J}_{\text{HH}} = 9.0$  Hz, 2H,  $\text{CH}_2\text{CHCH}=\text{CH}_2$ ); 1.71 (dd,  $^2\text{J}_{\text{HH}} = 4.9$  Hz,  $^3\text{J}_{\text{HH}} = 7.5$  Hz, 2H,  $\text{CH}_2\text{CHCH}=\text{CH}_2$ ); 2.59 (q,  $^3\text{J}_{\text{HH}} = 8.2$  Hz, 2H,  $\text{CH}_2\text{CHCH}=\text{CH}_2$ ); 3.62 (s, 4H,  $\text{CH}_2\text{O}$ ); 3.69 (t,  $^3\text{J}_{\text{HH}} = 4.9$  Hz, 4H,  $\text{CH}_2\text{O}$ ); 4.12–4.34 (m, 8H,  $\text{CH}_2\text{OCO}$ ); 5.10–5.16 (m, 2H,  $\text{CH}_2=\text{CH}$ ); 5.25–5.33 (m, 2H,  $\text{CH}_2=\text{CH}$ ); 5.36–5.50 (m, 2H,  $\text{CH}_2=\text{CH}$ ).  $^{13}\text{C NMR}$  (100 MHz,  $\text{CDCl}_3$ ):  $\delta$  = 14.3 ( $\text{CH}_3$ ); 20.6 ( $\text{CH}_2\text{CHCH}=\text{CH}_2$ ); 31.4 ( $\text{CH}_2\text{CHCH}=\text{CH}_2$ ); 35.9 ( $\text{COCCO}$ ); 61.6 ( $\text{CH}_2\text{O}$ ); 64.7 ( $\text{CH}_2\text{O}$ ); 69.0 ( $\text{CH}_2\text{O}$ ); 70.7 ( $\text{CH}_2\text{O}$ ); 118.7 ( $\text{CH}_2=\text{CH}$ ); 133.1 ( $\text{CH}_2=\text{CH}$ ); 167.2 ( $\text{OCO}$ ); 169.6 ( $\text{OCO}$ ).

## 2. Photo-Reactor Study

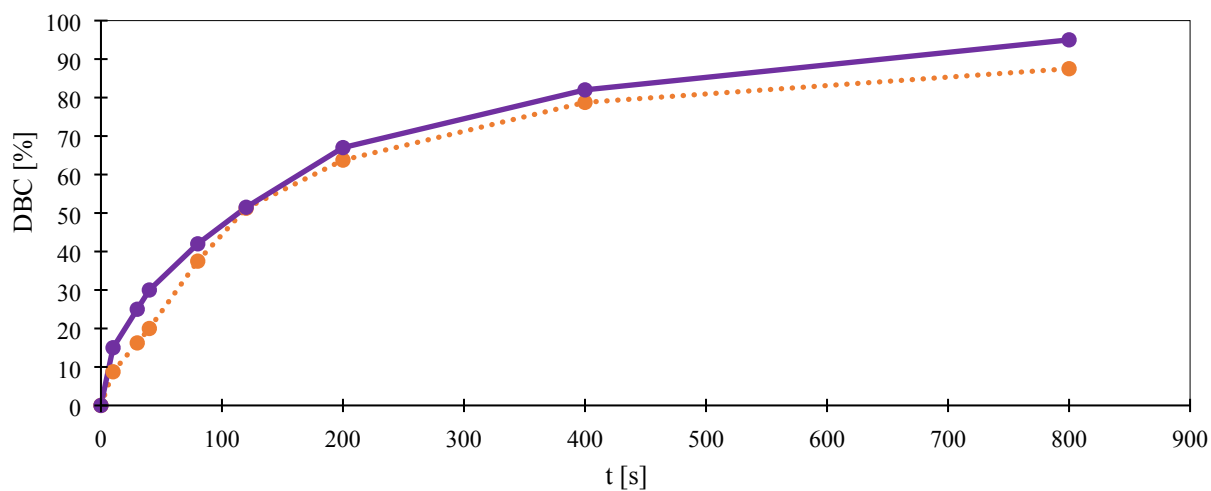

Figure S1: DBC of DVD (dot) and EVS (solid) over time in the photoreactor (irradiation source: Exfo OmniCure™ 2000 device with a broadband Hg-lamp, 300 s, 400–500 nm,  $\sim 8 \text{ mW cm}^{-2}$  on the surface of the sample)

## 3. Photo-DSC

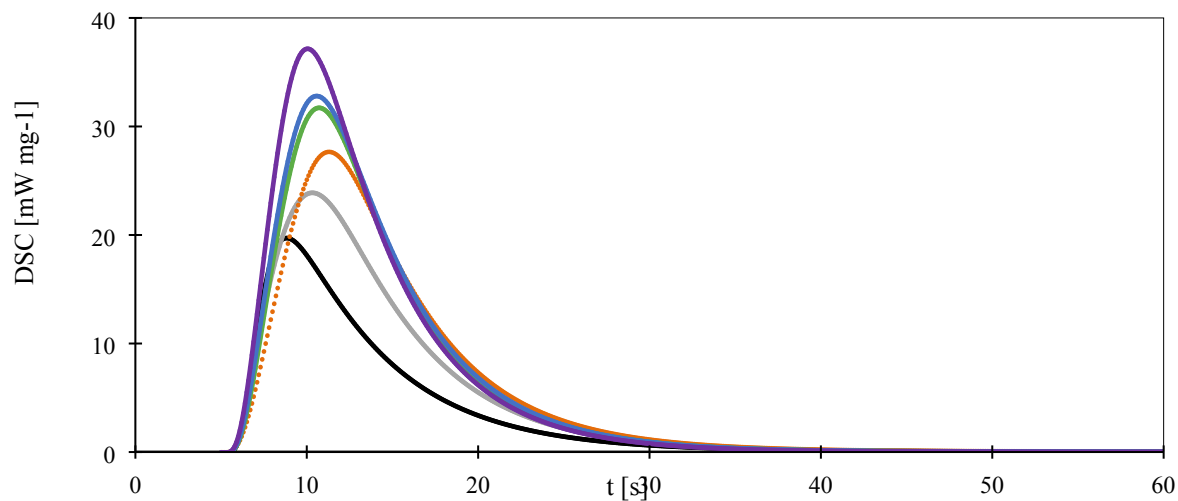

Figure S2: Photo-DSC data of all six formulations, MA (solid); VCP (solid), VCP/EVS\_5 (dot), VCP/EVS\_10 (short dash), VCP/EVS\_15 (long dash), VCP/EVS\_20 (dash dot); light irradiation starts at 5 s, light source: Omnicure 2000 with 400-500 nm filter, intensity  $\sim 20 \text{ mW cm}^{-2}$  at 25 °C

Table S1: Results from the photo DSC measurements, ( $t_{\max}$ ...time until maximum of the polymerization rate is reached,  $t_{95\%}$ ... when 95% of the overall heat was evolved,  $\Delta H$ ... overall reaction heat produced during photopolymerization)

| formulation | $t_{\max}$ [s] | $t_{95\%}$ [s] | $\Delta H$ [J g <sup>-1</sup> ] |
|-------------|----------------|----------------|---------------------------------|
| MA          | 2.6 ± 0.2      | 23.3 ± 1.5     | 170.8 ± 1.2                     |
| VCP         | 4.3 ± 0.1      | 21.1 ± 0.6     | 234.7 ± 5.4                     |
| VCP/EVS_5   | 4.9 ± 0.1      | 22.9 ± 0.7     | 277.4 ± 5.9                     |
| VCP/EVS_10  | 4.4 ± 0.1      | 19.3 ± 0.8     | 288.3 ± 2.5                     |
| VCP/EVS_15  | 4.5 ± 0.1      | 20.0 ± 0.2     | 305.9 ± 0.6                     |
| VCP/EVS_20  | 4.0 ± 0.1      | 18.2 ± 0.6     | 316.6 ± 5.4                     |

#### 4. RT-NIR-photorheology

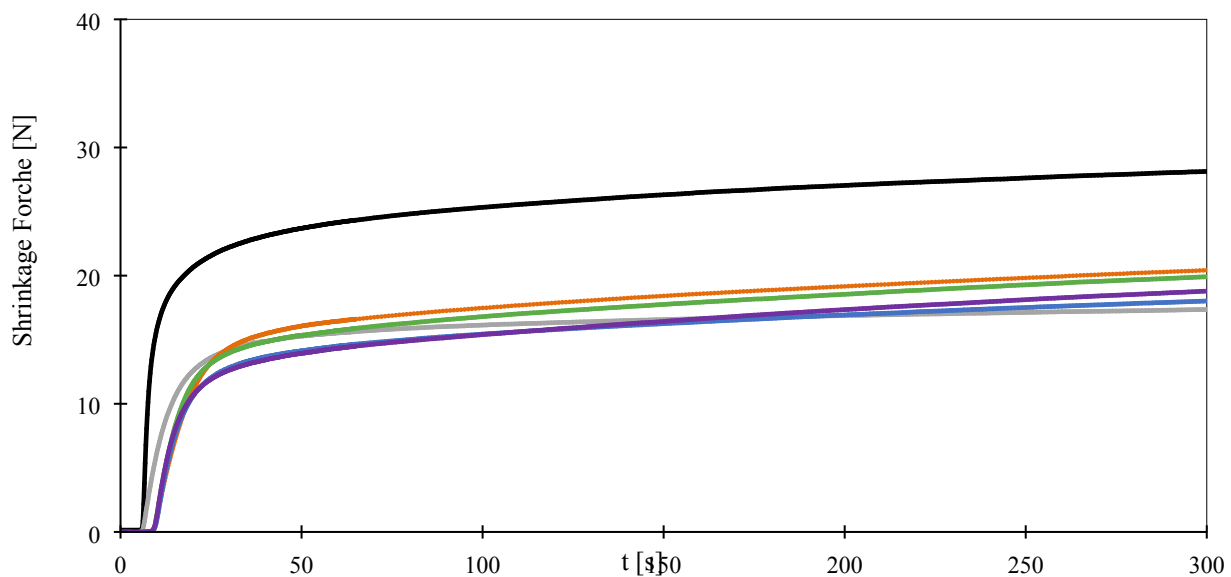

Figure S3: Shrinkage force plot from RT-NIR-photorheology measurements of all six formulations, MA (solid); VCP (solid), VCP/EVS\_5 (dot), VCP/ EVS\_10 (short dash), VCP/ EVS\_15 (long dash), VCP/ EVS\_20 (dash dot); light irradiation starts at 5 s, light source: Omnicure 2000 with 400-500 nm filter, intensity ~20 mW cm<sup>-2</sup> at 25 °C

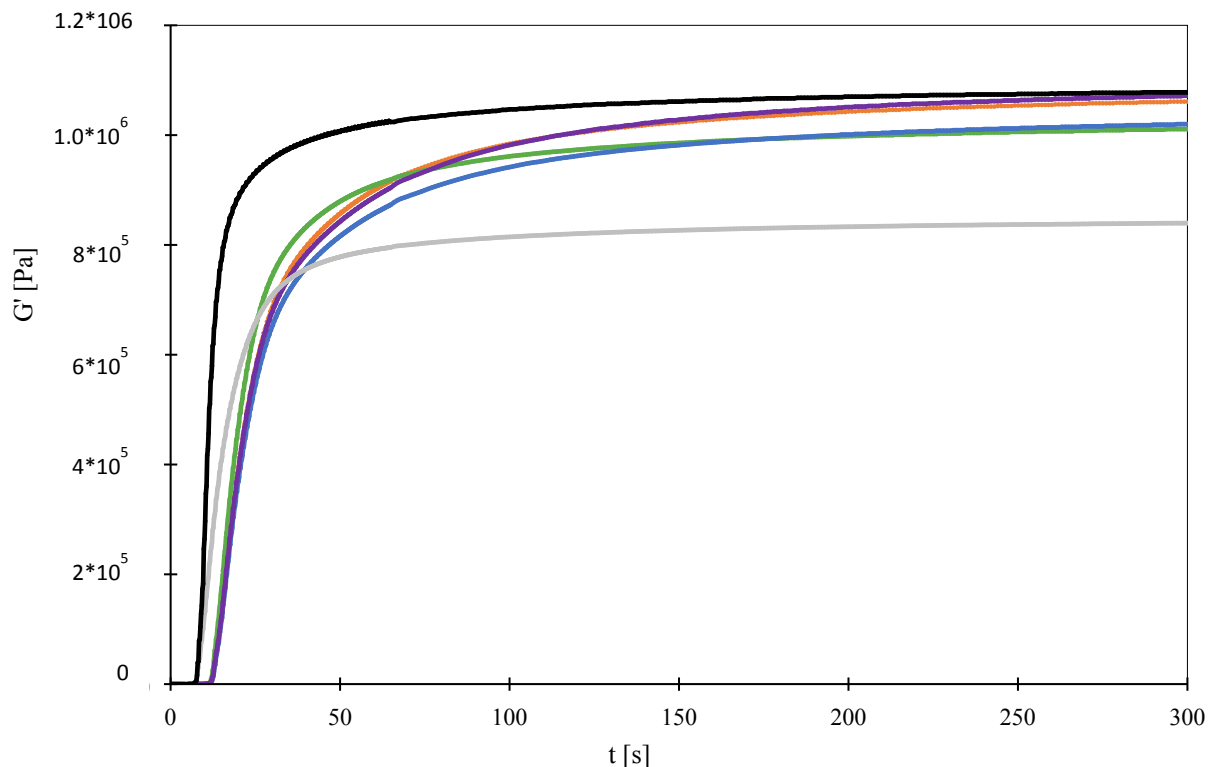

Figure S4: Storage modulus  $G'$  plot from RT-NIR-photorheology measurements of all six formulations, MA (solid); VCP (solid), VCP/EVS\_5 (dot), VCP/ EVS\_10 (short dash), VCP/ EVS\_15 (long dash), VCP/ EVS\_20 (dash dot); light irradiation starts at 5 s, light source: Omnicure 2000 with 400-500 nm filter, intensity  $\sim 20 \text{ mW cm}^{-2}$  at  $25 \text{ }^\circ\text{C}$

Table S2: Results from the RT-NIR-photorheology measurements, ( $t_{\text{gel}}$ ...time until gel point is reached,  $\text{DBC}_{\text{gel}}$ ... double bond conversion at the gel point,  $t_{95\% \text{rheo}}$ ... time until 95% of the final double bond conversion is reached,  $\text{DBC}_{\text{final}}$ ... final double bond conversion,  $F_N$  ... final normal force detected during the reaction,  $F_N$  at 70% DBC ... normal force value detected at 70% DBC,  $G'_{\text{final}}$  ... final storage modulus reached after photopolymerization)

| formulation | $t_{\text{gel}}$<br>[s] | $\text{DBC}_{\text{gel}}$<br>[%] | $t_{95\% \text{rheo}}$<br>[s] | $\text{DBC}_{\text{final}}$<br>[%] | $F_N$<br>[N]   | $F_N$ at 70%<br>DBC<br>[N] | $G'_{\text{final}}$<br>[MPa] |
|-------------|-------------------------|----------------------------------|-------------------------------|------------------------------------|----------------|----------------------------|------------------------------|
| MA          | 3.0                     | $38 \pm 2$                       | $85 \pm 2.0$                  | $70 \pm 0.8$                       | $27.3 \pm 1.8$ | $27.3 \pm 1.5$             | $1.08 \pm 0.18$              |
| VCP         | 2.0                     | $17 \pm 1$                       | $75 \pm 1.3$                  | $73 \pm 0.4$                       | $17.5 \pm 0.6$ | $16.3 \pm 0.3$             | $0.84 \pm 0.19$              |
| VCP/EVS_5   | 4.5                     | $23 \pm 1$                       | $158 \pm 1.5$                 | $79 \pm 0.3$                       | $19.9 \pm 0.5$ | $15.2 \pm 0.6$             | $1.04 \pm 0.04$              |
| VCP/EVS_10  | 5.0                     | $32 \pm 1$                       | $147 \pm 1.7$                 | $83 \pm 0.4$                       | $19.7 \pm 0.6$ | $14.0 \pm 0.8$             | $0.96 \pm 0.03$              |
| VCP/EVS_15  | 6.0                     | $44 \pm 1$                       | $132 \pm 3.0$                 | $87 \pm 0.9$                       | $18.4 \pm 0.4$ | $10.1 \pm 0.7$             | $0.98 \pm 0.05$              |
| VCP/EVS_20  | 6.0                     | $55 \pm 1$                       | $122 \pm 2.0$                 | $93 \pm 1.6$                       | $19.4 \pm 0.4$ | $7.9 \pm 0.3$              | $1.00 \pm 0.08$              |

## 5. Storage stability test

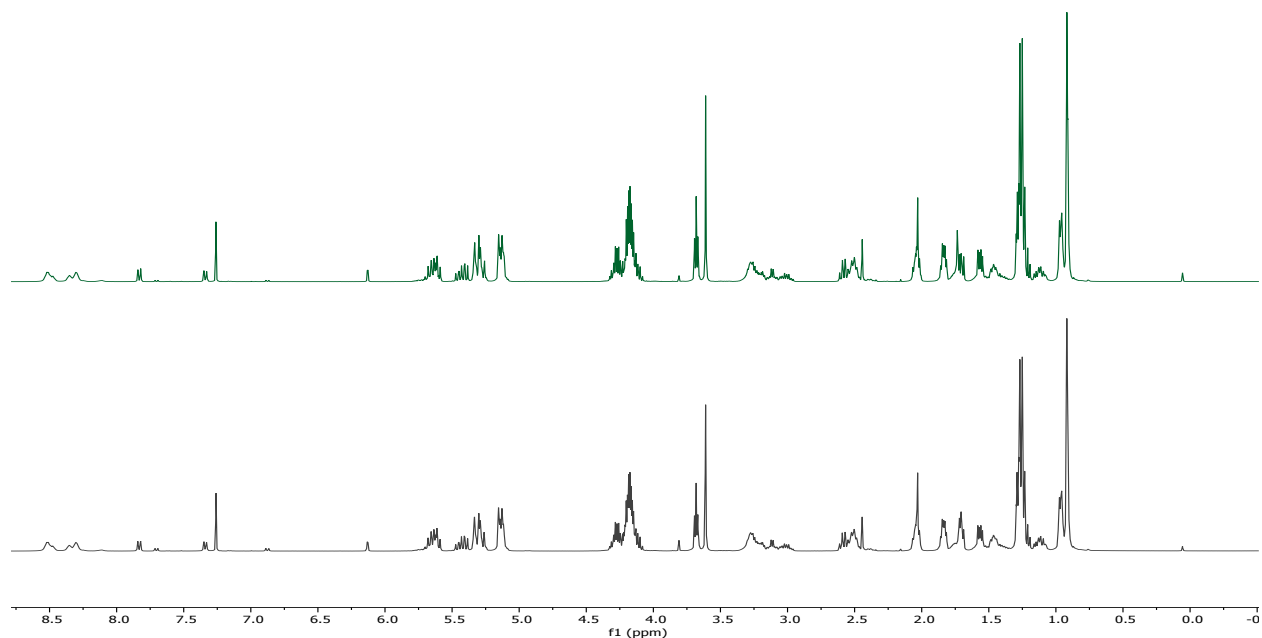

Figure S5:  $^1\text{H-NMR}$  spectroscopy of the formulation VCP/EVS\_5 immediately after mixing (green, solid,  $t=0$ ) and after 8 weeks (black, solid).

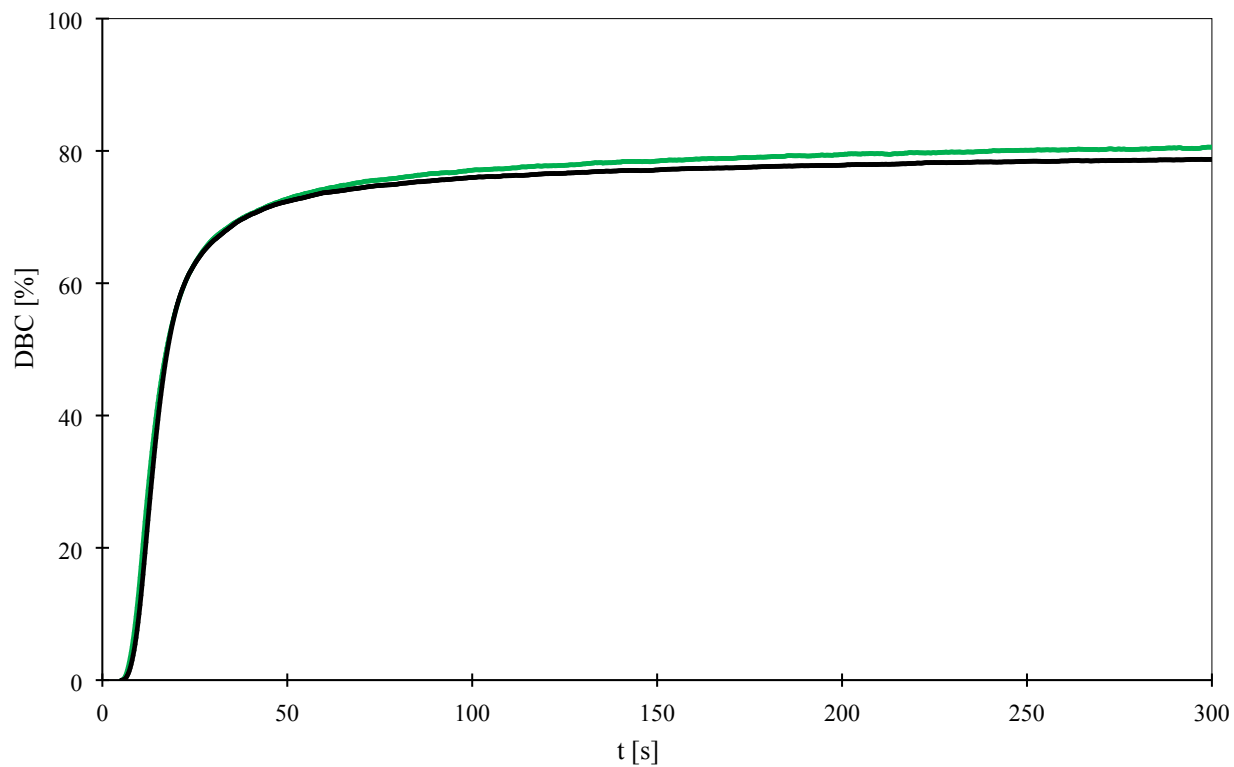

Figure S6: Double bond conversion DBC measured during RT-NIR-photoreology of the formulation VCP/EVS\_5 immediately after mixing (green, solid) and after 8 weeks (black, solid); light irradiation starts at 5 s, light source: Omnicure 2000 with 400-500 nm filter, intensity  $\sim 20 \text{ mW cm}^{-2}$  at  $25^\circ\text{C}$

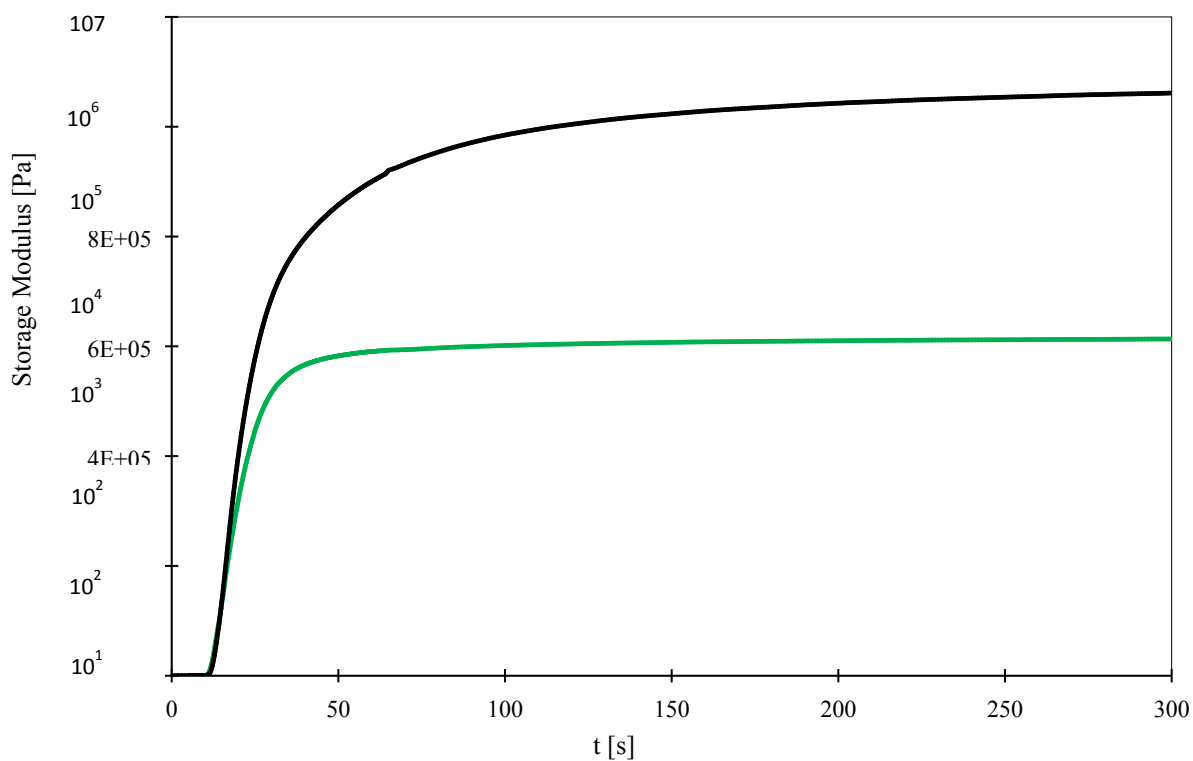

Figure S7: Storage modulus  $G'$  measured during RT-NIR-photorheology of the formulation VCP/EVS\_5 immediately after mixing (green, solid) and after 8 weeks (black, solid); light irradiation starts at 5 s, light source: Omnicure 2000 with 400-500 nm filter, intensity  $\sim 20 \text{ mW cm}^{-2}$  at  $25 \text{ }^\circ\text{C}$

## 6. Dynamic Mechanical Thermal Analysis (DMTA)

Table S3: Results from the DMTA measurement, ( $G'_{37^\circ\text{C}}$ ... storage modulus at  $37 \text{ }^\circ\text{C}$ ,  $T_g$ ... glass transition temperature at the maximum of the  $\tan \delta$  plot, fwhm... full width at half maximum of the  $\tan \delta$  plot,  $G'_r$ ... storage modulus at the rubbery plateau)

| specimen       | $G'_{37^\circ\text{C}}$<br>[MPa] | $T_g$<br>[ $^\circ\text{C}$ ] | fwhm<br>[ $^\circ\text{C}$ ] | $G'_r$<br>[MPa] |
|----------------|----------------------------------|-------------------------------|------------------------------|-----------------|
| polyMA         | 1520                             | 151                           | 101                          | 5               |
| polyVCP        | 878                              | 91                            | 29                           | 17              |
| polyVCP/EVS_5  | 928                              | 89                            | 28                           | 18              |
| polyVCP/EVS_10 | 897                              | 90                            | 27                           | 17              |
| polyVCP/EVS_15 | 1160                             | 81                            | 26                           | 14              |
| polyVCP/EVS_20 | 1050                             | 68                            | 26                           | 7               |



## 7. Tensile Tests

Tables S4: Stress (maximum value recorded) and strain at break values of the tensile test measurements

| specimen       | Stress [MPa] | Strain at break [%] |
|----------------|--------------|---------------------|
| polyMA         | 69.10 ± 4.03 | 4.33 ± 1.0          |
| polyVCP        | 46.18 ± 2.74 | 4.87 ± 0.4          |
| polyVCP/EVS_5  | 48.12 ± 1.33 | 7.75 ± 1.2          |
| polyVCP/EVS_10 | 51.33 ± 0.93 | 6.60 ± 1.1          |
| polyVCP/EVS_15 | 53.17 ± 2.22 | 8.14 ± 1.1          |
| polyVCP/EVS_20 | 56.61 ± 1.02 | 6.04 ± 0.2          |

## 8. Shrinkage force measurements of composite formulations

Table S5: Shrinkage force measurement data, (F0-600... occurring shrinkage force at 0 s, 125 s, 130 s, 400 s and 600 s)

| formulation | F0<br>[N] | F125<br>[N] | F130<br>[N] | F200<br>[N] | F400<br>[N] | F600<br>[N] |
|-------------|-----------|-------------|-------------|-------------|-------------|-------------|
| MA          | 0         | 46.9 ± 2.7  | 49.2 ± 2.9  | 52.4 ± 3.1  | 54.3 ± 3.3  | 55.3 ± 3.3  |
| VCP         | 0         | 39.5 ± 1.3  | 41.5 ± 1.3  | 44.6 ± 1.4  | 46.1 ± 1.4  | 46.9 ± 1.4  |
| VCP/EVS_5   | 0         | 38.2 ± 2.6  | 40.1 ± 2.8  | 42.8 ± 3.0  | 43.9 ± 3.1  | 44.2 ± 3.3  |
| VCP/EVS_10  | 0         | 38.3 ± 1.6  | 40.3 ± 1.9  | 43.1 ± 2.2  | 44.2 ± 2.2  | 44.6 ± 2.3  |
| VCP/EVS_15  | 0         | 38.9 ± 0.9  | 40.9 ± 1.0  | 43.9 ± 1.2  | 45.2 ± 1.3  | 45.8 ± 1.3  |
| VCP/EVS_20  | 0         | 36.9 ± 1.5  | 38.5 ± 1.7  | 41.1 ± 1.9  | 42.1 ± 2.2  | 42.5 ± 2.1  |

## 9. Mechanical properties of composite formulations

Table S6: Flexural strength measuring data after 24 h stored at room temperature

| specimen       | Flexural strength<br>[N mm <sup>-2</sup> ] | E-Modulus<br>[MPa] |
|----------------|--------------------------------------------|--------------------|
| polyMA         | 144.9 ± 15.0                               | 8215 ± 712         |
| polyVCP        | 112.8 ± 9.2                                | 6600 ± 628         |
| polyVCP/EVS_5  | 117.1 ± 6.2                                | 7097 ± 272         |
| polyVCP/EVS_10 | 112.3 ± 4.0                                | 6969 ± 239         |
| polyVCP/EVS_15 | 109.8 ± 3.0                                | 7160 ± 434         |
| polyVCP/EVS_20 | 107.4 ± 5.2                                | 7277 ± 360         |
